# Supplementary material for: Enhanced photocatalytic performance of novel electrospun BN/TiO2 composite nanofibers
Source: Royal Society of Chemistry journal article supplement (doi:10.1039/c6nj03088b), 2016-11-15
Supplement: c6nj03088b1.pdf [file c6nj03088b1.pdf]

## Electronic Supplementary Information

Journal: New journal of chemistry

# Enhanced photocatalytic performance of novel electrospun BN/TiO<sub>2</sub> composite nanofibers

Maryline Nasr<sup>†</sup>, Roman Viter, Cynthia Eid, Roland Habchi, Philippe Miele, Mikhael Bechelany<sup>†</sup>

Table S1. The data of the Gaussian fitting of deconvoluted PL spectra, 3 peaks for each spectrum.

|                               |    | Center | Width  | Height | Normalized intensity ratio | Normalized Area ratio |
|-------------------------------|----|--------|--------|--------|----------------------------|-----------------------|
| TiO <sub>2</sub>              | 11 | 420.17 | 58.262 | 57.213 | 0.03711                    | 0.01480               |
|                               | 12 | 547.34 | 146.03 | 1541.7 | 1                          | 1                     |
|                               | 13 | 714.29 | 65.604 | 198.50 | 0.12875                    | 0.05784               |
| BN (3wt. %)/TiO <sub>2</sub>  | 11 | 436.99 | 35.974 | 131.48 | 0.081                      | 0.01898               |
|                               | 12 | 545.50 | 153.53 | 1623.2 | 1                          | 1                     |
|                               | 13 | 718.88 | 61.821 | 161.34 | 0.09939                    | 0.04002               |
| BN (5wt. %)/TiO <sub>2</sub>  | 11 | 428.89 | 19.908 | 103.44 | 0.05256                    | 0.00841               |
|                               | 12 | 547.82 | 124.42 | 1967.9 | 1                          | 1                     |
|                               | 13 | 661.18 | 149.20 | 1371   | 0.69668                    | 0.83576               |
| BN (7wt. %)/TiO <sub>2</sub>  | 11 | 425.16 | 27.381 | 187.04 | 0.06652                    | 0.01279               |
|                               | 12 | 572.01 | 142.37 | 2811.7 | 1                          | 1                     |
|                               | 13 | 713.84 | 95.648 | 641.47 | 0.22814                    | 0.15327               |
| BN (10wt. %)/TiO <sub>2</sub> | 11 | 432.67 | 25.360 | 109.96 | 0.03371                    | 0.00557               |
|                               | 12 | 558.56 | 153.32 | 3261.3 | 1                          | 1                     |
|                               | 13 | 711.51 | 69.250 | 378.92 | 0.11618                    | 0.05247               |
